# Supplementary material for: Transcriptomic and lipidomic profiling reveals distinct bioactive lipid signatures in slow and fast muscles and highlights the role of resolvin‐D2 in fiber type determination during myogenesis
Source: PubMed Central journal article supplement — FASEB J. 2024 Dec 19;38(24):e70250. doi: 10.1096/fj.202401747R (PMC11656512; doi:10.1096/fj.202401747r), 2024-12-19
Supplement: FSB2-38-e70250-s001.pdf [file FSB2-38-e70250-s001.pdf]

**Supplementary material for**

**Transcriptomic and lipidomic profiling reveals distinct bioactive lipid signatures in slow and fast muscles and highlights the role of Resolvin-D2 in fiber type determination during myogenesis.**

Lupann Rieger, Thomas Molina, Paul Fabre, Karine Greffard, Ornella Pellerito, Junio Dort, Jean-François Bilodeau, Nicolas A. Dumont

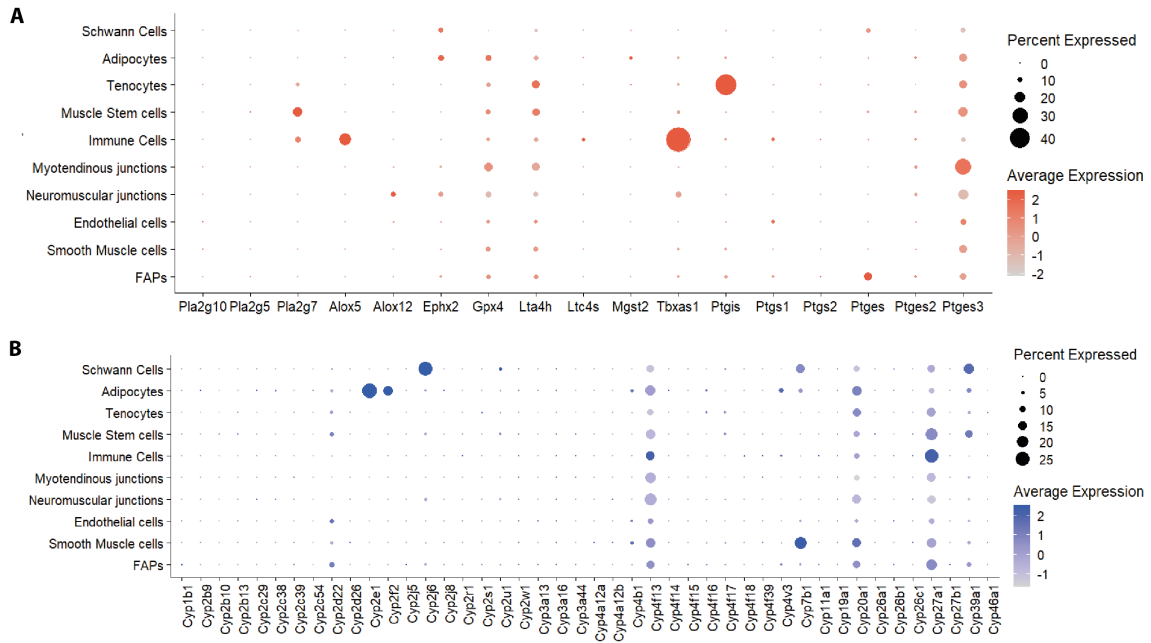

**Suppl. Fig. 1: Differential expression patterns of lipid mediator enzymes in different cell types of mouse skeletal muscle. A,B)** Dot plots showing the expression of different bioactive lipid biosynthesizing enzymes involved in the conversion of AA, LA, DHA, and EPA (A) as well as Cyp enzymes (B) across the different cell types: Schwann cells, adipocytes, tenocytes, muscle stem cells, immune cells, myotendinous junctions, neuromuscular junctions, endothelial cells, smooth muscle cells, and fibroadipogenic progenitors (FAPs).

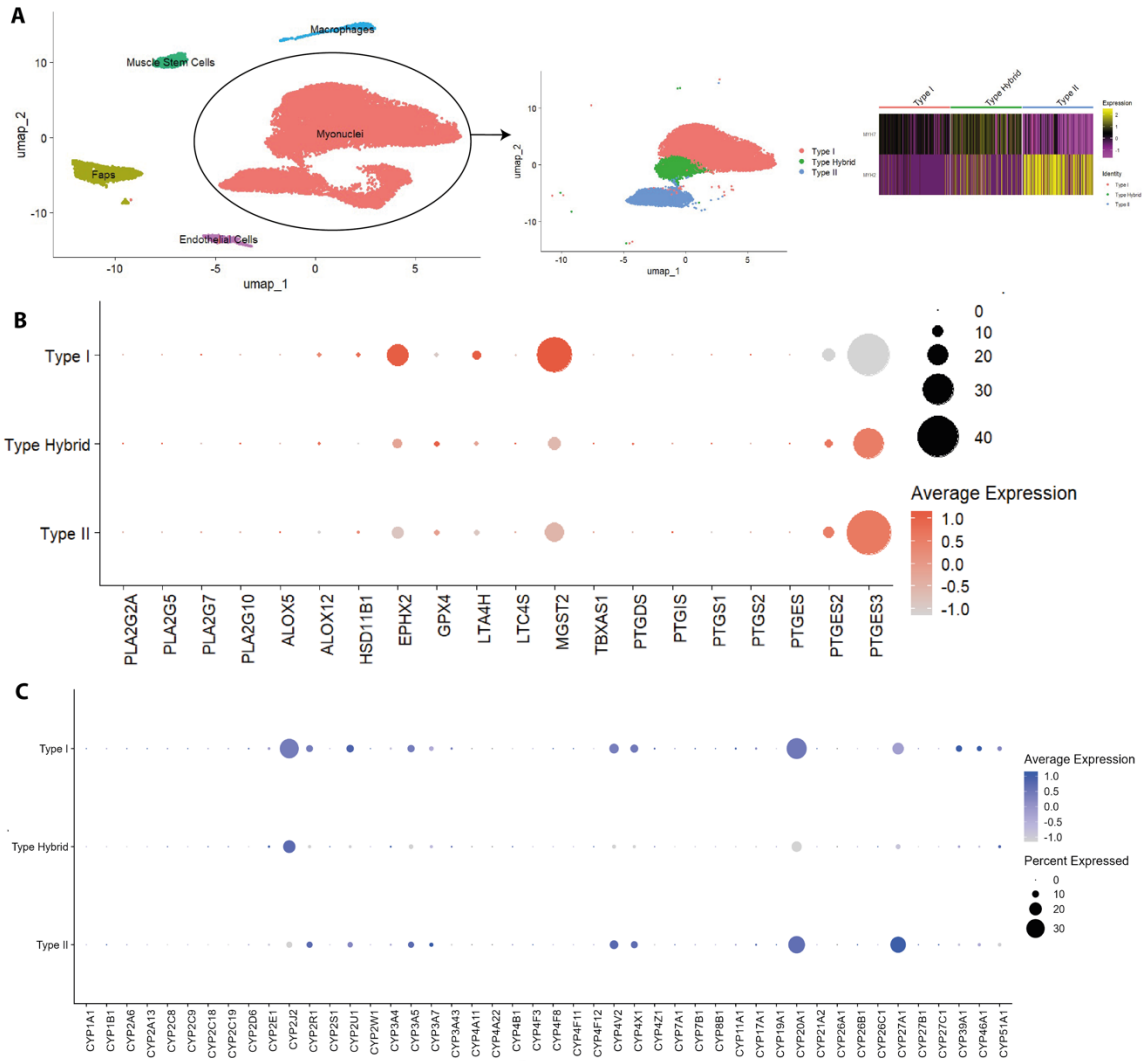

**Suppl. Fig. 2: Differential expression patterns of lipid mediator enzymes in slow and fast myonuclei from human muscles.** **A)** Single nuclei RNAseq dataset of gastrocnemius muscle biopsies from human was used to study gene expression in type I, II, and hybrid fibers. **B,C)** Dot plots showing the expression of different bioactive lipid biosynthesizing enzymes involved in the conversion of AA, LA, DHA, and EPA (**B**) as well as Cyp enzymes (**C**) across the different fiber types.

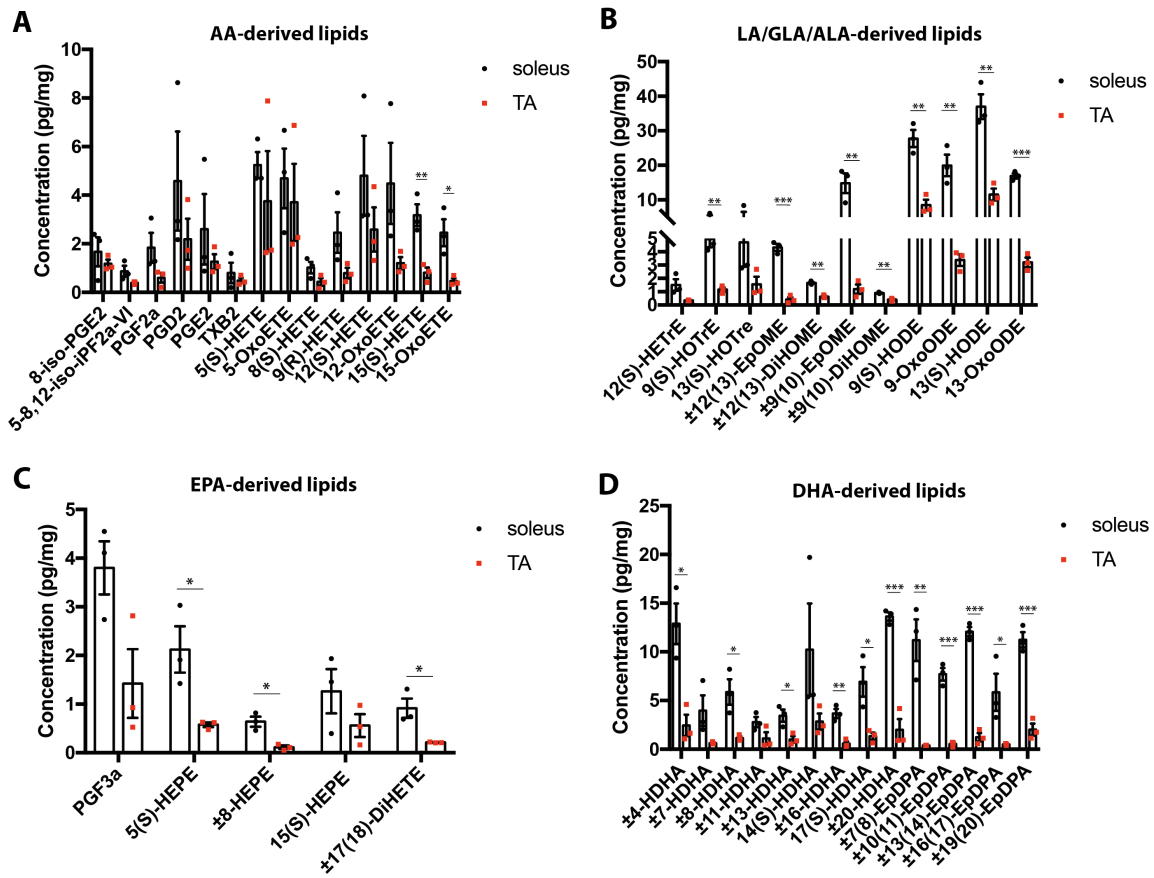

**Suppl. Figure 3: Detailed results showing the differential pattern of expression of bioactive lipid mediators in slow and fast-twitch muscle.** Mass Spectrometry analysis was performed on slow-twitch muscle (soleus) vs fast-twitch muscle (tibialis anterior). Bar graphs showing the expression of bioactive lipids derived from **A**) Arachidonic acid (AA), **B**) linoleic acid (LA)/gamma-linoleic acid (GLA)/alpha-linolenic acid (ALA), **C**) eicosapentaenoic acid (EPA), and **D**) docosahexaenoic acid (DHA). Data are expressed as pg/mg of muscle. Statistical analysis was performed using unpaired Student's t-test. \* $p < 0.05$ , \*\* $p < 0.01$ , \*\*\* $p < 0.001$ .

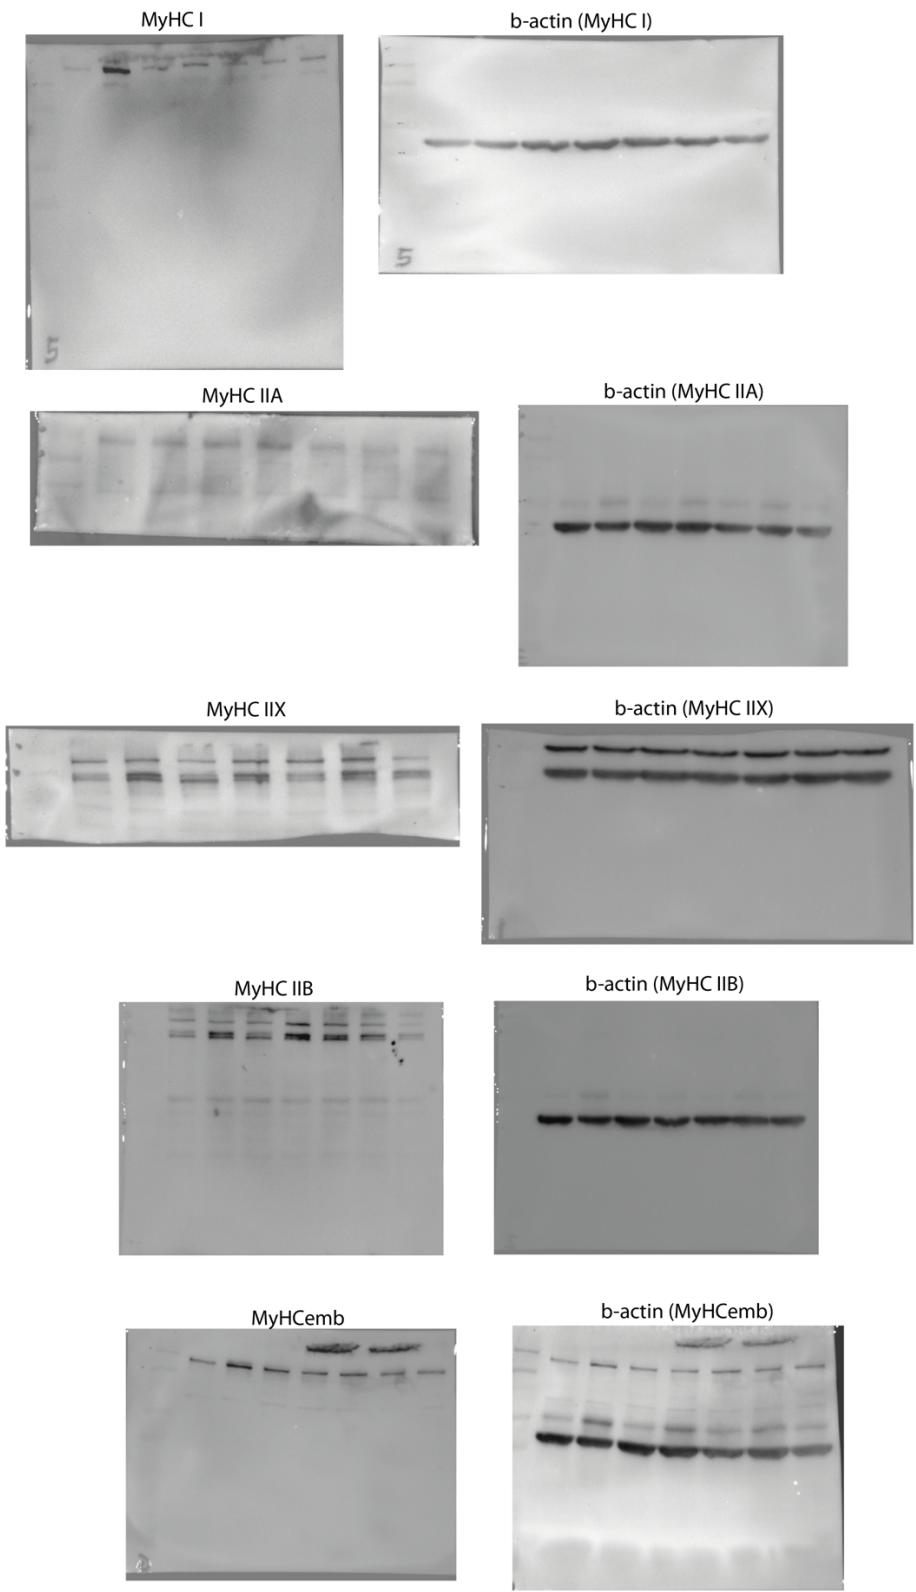

**Suppl. Figure 4: Full unedited western blot.**



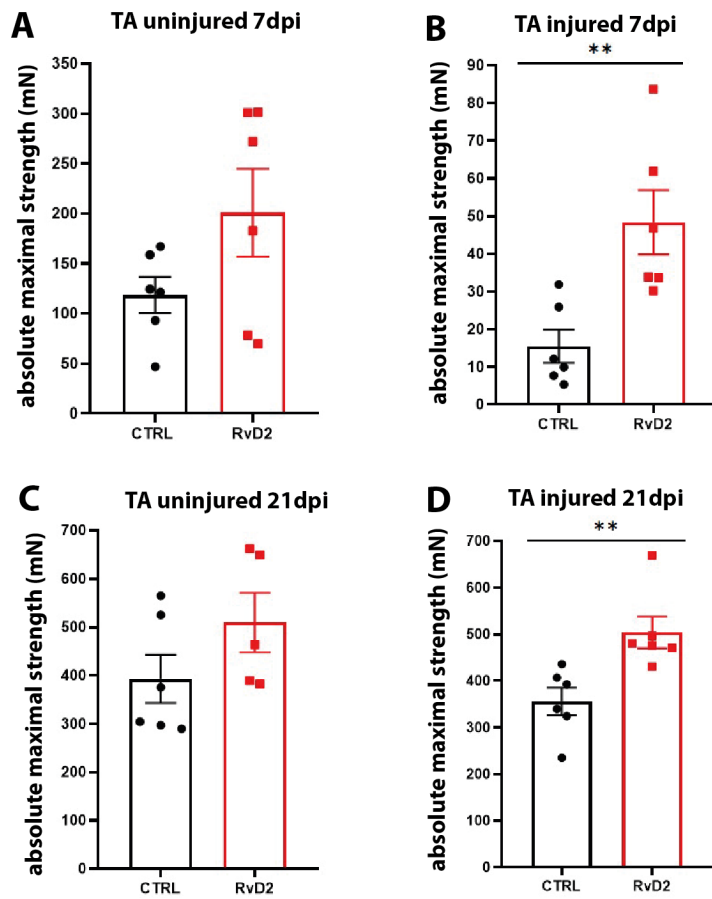

**Suppl. Figure 6: Absolute muscle strength.** Maximal absolute strength (mN) of the uninjured (A, C) and injured TA muscle (B, D) at 7 (A,B), and 21 (C,D) days post-injury (DPI).

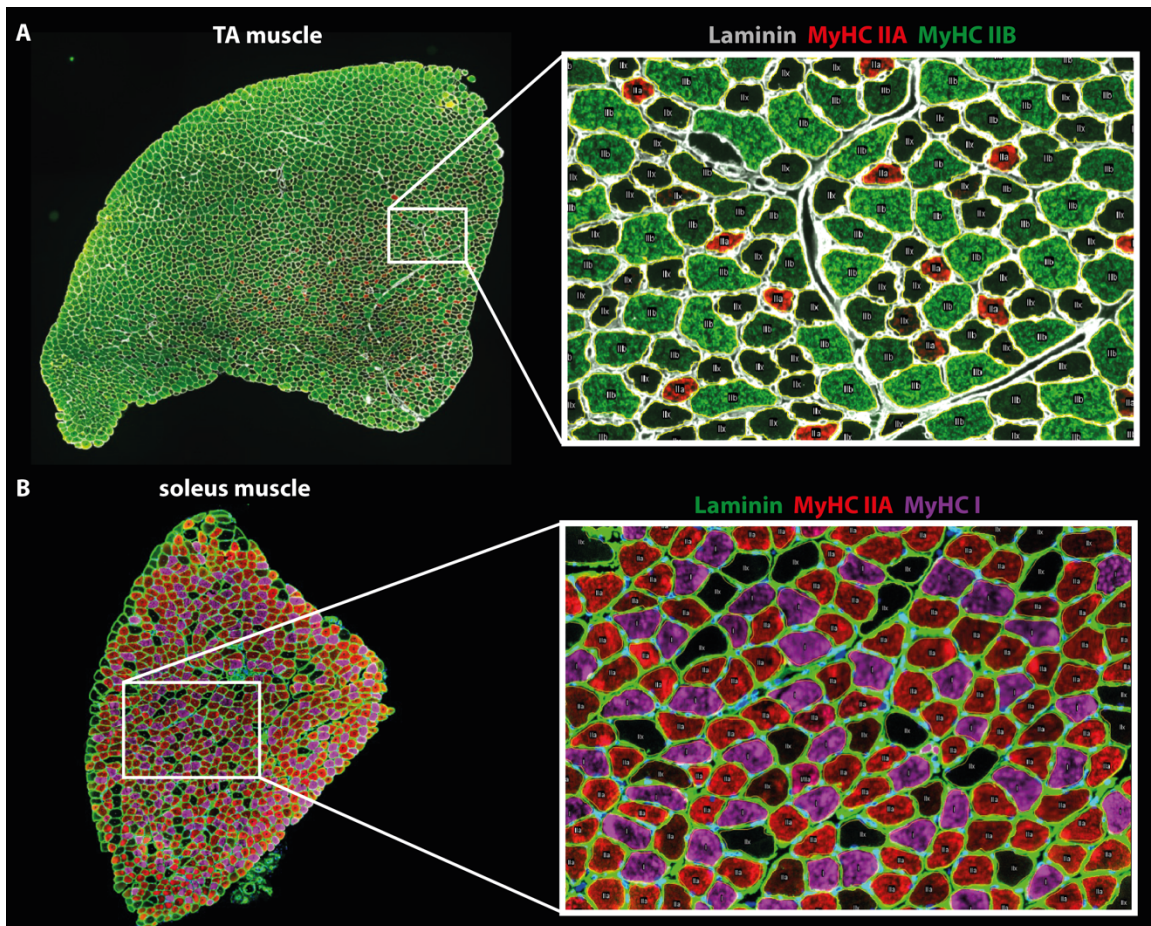

**Suppl. Fig. 7: Immunofluorescence on muscle tissue sections.** **A)** Immunofluorescence staining on TA muscle section for laminin (white), MyHC IIB (green) and MyHC IIA (red). Dark fibers are type IIX. MyHC I staining was performed on another slide and was almost not expressed in TA. **B)** Immunofluorescence staining on soleus muscle section for laminin (green), MyHC I (red) and MyHC IIA (violet). Dark fibers are type IIX. MyHC IIB staining was performed on another slide and was virtually not expressed in the soleus muscle. All fibers from the whole section were analyzed to determine fiber type proportion and minimal feret diameter using the Myosight software.



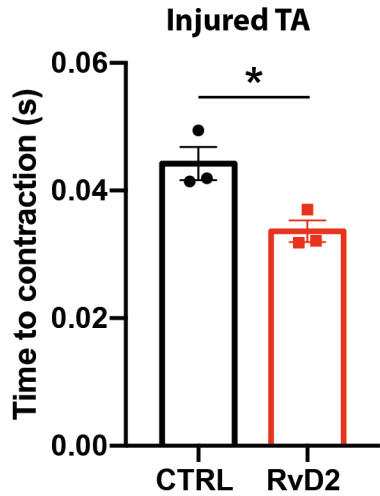

**Suppl. Fig. 8: Resolvin-D2 influences muscle contraction velocity.** Mice were treated for 21 days post-injury with daily i.p. injection of RvD2 or vehicle. Muscle contractile properties were assessed in situ to determine the time to peak tension of injured TA muscle following twitch contraction. Data are presented as mean  $\pm$  SEM and  $n = 3$  mice per group. Data were analyzed using unpaired Student's t-test.  $*p < 0.05$ .

**Supplementary table 1.** Multiple reaction monitoring transitions for tandem mass spectrometry optimized for each oxylipin and associated internal standard

| Compound                                 | Retention time (min) | Compound MRM transition (precursor ion → product ion) | Internal standard                          | Internal standard MRM transition (precursor ion → product ion) |
|------------------------------------------|----------------------|-------------------------------------------------------|--------------------------------------------|----------------------------------------------------------------|
| <b>E<sub>2</sub>-Isops (15-series)</b>   |                      |                                                       |                                            |                                                                |
| 15-E <sub>2t</sub> -Isop                 | 8.38                 | 351.2 → 271.1                                         | 15-F <sub>2t</sub> -Isop-d4                | 357.3 → 197.2                                                  |
| <b>F<sub>2</sub>-Isops (5-series)</b>    |                      |                                                       |                                            |                                                                |
| 5-F <sub>2t</sub> -Isop                  | 8.03                 | 353.0 → 115.0                                         | 5-F <sub>2t</sub> -Isop-d11                | 364.2 → 115.0                                                  |
| 5- <i>epi</i> -5-F <sub>2t</sub> -Isop   | 8.19                 | 353.0 → 115.0                                         | 5- <i>epi</i> -5-F <sub>2t</sub> -Isop-d11 | 364.2 → 115.0                                                  |
| 5( <i>RS</i> )-5-F <sub>2c</sub> -IsoP   | 9.59                 | 353.0 → 115.0                                         | 5( <i>RS</i> )-5-F <sub>2c</sub> -IsoP-d11 | 364.2 → 115.0                                                  |
| <b>F<sub>2</sub>-Isops (8-series)</b>    |                      |                                                       |                                            |                                                                |
| 8-F <sub>2t</sub> -Isop                  | 7.43                 | 353.0 → 127.0                                         | 8-F <sub>2t</sub> -Isop-d4                 | 357.0 → 127.0                                                  |
| <b>F<sub>2</sub>-Isops (15-series)</b>   |                      |                                                       |                                            |                                                                |
| 15- <i>epi</i> -15-F <sub>2t</sub> -IsoP | 7.59                 | 353.3 → 193.2                                         | 15-F <sub>2t</sub> -IsoP-d4                | 357.3 → 197.2                                                  |
| 15-F <sub>2t</sub> -IsoP                 | 7.90                 | 353.3 → 193.2                                         | 15-F <sub>2t</sub> -IsoP-d4                | 357.3 → 197.2                                                  |
| 15- <i>epi</i> -PGF <sub>2α</sub>        | 8.48                 | 353.3 → 193.2                                         | 15-F <sub>2t</sub> -IsoP-d4                | 357.3 → 197.2                                                  |
| 5- <i>trans</i> -PGF <sub>2α</sub>       | 8.64                 | 353.3 → 193.2                                         | 15-F <sub>2t</sub> -IsoP-d4                | 357.3 → 197.2                                                  |
| <b>F<sub>3</sub>-Isops (5-series)</b>    |                      |                                                       |                                            |                                                                |
| 5-F <sub>3t</sub> -Isop                  | 6.44                 | 351.3 → 115.0                                         | 8-F <sub>2t</sub> -Isop-d4                 | 357.0 → 127.0                                                  |
| <b>F<sub>3</sub>-IsoPs (8-series)</b>    |                      |                                                       |                                            |                                                                |
| 8-F <sub>3t</sub> -Isop                  | 6.27                 | 351.3 → 127.0                                         | 8-F <sub>2t</sub> -Isop-d4                 | 357.0 → 127.0                                                  |
| 8- <i>epi</i> -8-F <sub>3t</sub> -Isop   | 6.91                 | 351.3 → 127.0                                         | 8-F <sub>2t</sub> -Isop-d4                 | 357.0 → 127.0                                                  |
| <b>F<sub>3</sub>-Isops (15-series)</b>   |                      |                                                       |                                            |                                                                |
| 15-F <sub>3t</sub> -Isop                 | 6.74                 | 351.1 → 193.2                                         | 8-F <sub>2t</sub> -Isop-d4                 | 357.0 → 127.0                                                  |
| <b>F<sub>3</sub>-IsoPs (18-series)</b>   |                      |                                                       |                                            |                                                                |
| 18- <i>epi</i> -18-F <sub>3t</sub> -Isop | 6.18                 | 351.3 → 193.1                                         | 8-F <sub>2t</sub> -Isop-d4                 | 357.0 → 127.0                                                  |
| 18-F <sub>3t</sub> -Isop                 | 6.78                 | 351.3 → 153.0                                         | 8-F <sub>2t</sub> -Isop-d4                 | 357.0 → 127.0                                                  |
| <b>F<sub>4</sub>-NeuroPs (4-series)</b>  |                      |                                                       |                                            |                                                                |
| 4-F <sub>4t</sub> -NeuroP                | 8.81                 | 377.2 → 101.0                                         | 5( <i>RS</i> )-5-F <sub>2c</sub> -IsoP-d11 | 364.2 → 115.0                                                  |
| 4- <i>epi</i> -4-F <sub>4t</sub> -NeuroP | 8.92                 | 377.2 → 101.0                                         | 5( <i>RS</i> )-5-F <sub>2c</sub> -IsoP-d11 | 364.2 → 115.0                                                  |
| <b>F<sub>4</sub>-NeuroPs (10-series)</b> |                      |                                                       |                                            |                                                                |
| 10-F <sub>4t</sub> -NeuroP               | 8.11                 | 377.2 → 153.0                                         | 5- <i>epi</i> -5-F <sub>2t</sub> -Isop-d11 | 364.2 → 115.0                                                  |

|                                            |       |               |                                            |               |
|--------------------------------------------|-------|---------------|--------------------------------------------|---------------|
| 10- <i>epi</i> -10-F <sub>4t</sub> -NeuroP | 8.51  | 377.2 → 153.0 | 5- <i>epi</i> -5-F <sub>2t</sub> -Isop-d11 | 364.2 → 115.0 |
| <b>F<sub>4</sub>-NeuroPs (14-series)</b>   |       |               |                                            |               |
| 14-F <sub>4t</sub> -NeuroP                 | 8.29  | 377.2 → 205.0 | 5- <i>epi</i> -5-F <sub>2t</sub> -Isop-d11 | 364.2 → 115.0 |
| 14- <i>epi</i> -14-F <sub>4t</sub> -NeuroP | 8.51  | 377.2 → 205.0 | 5- <i>epi</i> -5-F <sub>2t</sub> -Isop-d11 | 364.2 → 115.0 |
| <b>F<sub>4</sub>-NeuroPs (20-series)</b>   |       |               |                                            |               |
| 20- <i>epi</i> -20-F <sub>4t</sub> -NeuroP | 8.00  | 377.2 → 275.0 | 5-F <sub>2t</sub> -Isop-d11                | 364.2 → 115.0 |
| 20-F <sub>4t</sub> -NeuroP                 | 8.42  | 377.2 → 275.0 | 5- <i>epi</i> -5-F <sub>2t</sub> -Isop-d11 | 364.2 → 115.0 |
| <b>Precursors</b>                          |       |               |                                            |               |
| ±17(18)-DiHETE                             | 11.50 | 335.1 → 247.1 | 5(S)-HETE-d <sub>8</sub>                   | 327.2 → 116.0 |
| ±14(15)-DiHETE                             | 11.78 | 335.1 → 237.1 | 5(S)-HETE-d <sub>8</sub>                   | 327.2 → 116.0 |
| ±11(12)-DiHETE                             | 11.92 | 335.1 → 167.1 | 5(S)-HETE-d <sub>8</sub>                   | 327.2 → 116.0 |
| ±8(9)-DiHETE                               | 12.14 | 335.1 → 185.1 | 5(S)-HETE-d <sub>8</sub>                   | 327.2 → 116.0 |
| ±5(6)-DiHETE                               | 12.69 | 335.1 → 145.1 | 5(S)-HETE-d <sub>8</sub>                   | 327.2 → 116.0 |
| ±12(13)-DiHOME                             | 12.30 | 313.2 → 183.2 | 5(S)-HETE-d <sub>8</sub>                   | 327.2 → 116.0 |
| ±9(10)-DiHOME                              | 12.54 | 313.2 → 201.2 | 5(S)-HETE-d <sub>8</sub>                   | 327.2 → 116.0 |
| ±19(20)-DiHDPA                             | 12.92 | 361.1 → 229.1 | 5(S)-HETE-d <sub>8</sub>                   | 327.2 → 116.0 |
| ±16(17)DiHDPA                              | 13.10 | 361.1 → 233.1 | 5(S)-HETE-d <sub>8</sub>                   | 327.2 → 116.0 |
| ±13(14)-DiHDPA                             | 13.20 | 361.1 → 193.1 | 5(S)-HETE-d <sub>8</sub>                   | 327.2 → 116.0 |
| ±10(11)-DiHDPA                             | 13.33 | 361.1 → 153.1 | 5(S)-HETE-d <sub>8</sub>                   | 327.2 → 116.0 |
| ±7(8)-DiHDPA                               | 13.64 | 361.1 → 127.1 | 5(S)-HETE-d <sub>8</sub>                   | 327.2 → 116.0 |
| 9(S)-HOTrE                                 | 13.15 | 293.3 → 275.2 | 5(S)-HETE-d <sub>8</sub>                   | 327.2 → 116.0 |
| 13(S)-HOTrE                                | 13.29 | 293.3 → 195.1 | 5(S)-HETE-d <sub>8</sub>                   | 327.2 → 116.0 |
| 13(S)-HOTrE(γ)                             | 13.41 | 293.3 → 193.1 | 5(S)-HETE-d <sub>8</sub>                   | 327.2 → 116.0 |
| ±18-HEPE                                   | 13.31 | 317.2 → 219.2 | 5(S)-HETE-d <sub>8</sub>                   | 327.2 → 116.0 |
| 15(S)-HEPE                                 | 13.51 | 317.2 → 219.2 | 5(S)-HETE-d <sub>8</sub>                   | 327.2 → 116.0 |
| ±11-HEPE                                   | 13.56 | 317.2 → 195.2 | 5(S)-HETE-d <sub>8</sub>                   | 327.2 → 116.0 |
| ±8-HEPE                                    | 13.62 | 317.2 → 155.1 | 5(S)-HETE-d <sub>8</sub>                   | 327.2 → 116.0 |
| 12(S)-HEPE                                 | 13.69 | 317.2 → 207.2 | 5(S)-HETE-d <sub>8</sub>                   | 327.2 → 116.0 |
| ±9-HEPE                                    | 13.76 | 317.2 → 123.1 | 5(S)-HETE-d <sub>8</sub>                   | 327.2 → 116.0 |
| 5(S)-HEPE                                  | 13.87 | 317.2 → 115.1 | 5(S)-HETE-d <sub>8</sub>                   | 327.2 → 116.0 |
| 13-OxoODE                                  | 13.99 | 293.1 → 113.1 | 5(S)-HETE-d <sub>8</sub>                   | 327.2 → 116.0 |
| 9-OxoODE                                   | 14.13 | 293.1 → 185.1 | 5(S)-HETE-d <sub>8</sub>                   | 327.2 → 116.0 |
| 13(S)-HODE                                 | 14.01 | 295.1 → 195.1 | 5(S)-HETE-d <sub>8</sub>                   | 327.2 → 116.0 |

|               |       |               |                          |               |
|---------------|-------|---------------|--------------------------|---------------|
| 9(S)-HODE     | 14.03 | 295.1 → 171.1 | 5(S)-HETE-d <sub>8</sub> | 327.2 → 116.0 |
| ±17(18)-EpETE | 14.01 | 317.1 → 259.2 | 5(S)-HETE-d <sub>8</sub> | 327.2 → 116.0 |
| ±14(15)-EpETE | 14.20 | 317.1 → 247.1 | 5(S)-HETE-d <sub>8</sub> | 327.2 → 116.0 |
| ±11(12)-EpETE | 14.24 | 317.1 → 167.1 | 5(S)-HETE-d <sub>8</sub> | 327.2 → 116.0 |
| ±8(9)-EpETE   | 14.29 | 317.1 → 155.1 | 5(S)-HETE-d <sub>8</sub> | 327.2 → 116.0 |
| ±20-HDHA      | 14.08 | 343.2 → 285.2 | 5(S)-HETE-d <sub>8</sub> | 327.2 → 116.0 |
| ±16-HDHA      | 14.18 | 343.2 → 233.2 | 5(S)-HETE-d <sub>8</sub> | 327.2 → 116.0 |
| 17(S)-HDHA    | 14.20 | 343.2 → 201.0 | 5(S)-HETE-d <sub>8</sub> | 327.2 → 116.0 |
| ±13-HDHA      | 14.25 | 343.2 → 221.1 | 5(S)-HETE-d <sub>8</sub> | 327.2 → 116.0 |
| ±10-HDHA      | 14.30 | 343.2 → 190.1 | 5(S)-HETE-d <sub>8</sub> | 327.2 → 116.0 |
| 14(S)-HDHA    | 14.31 | 343.2 → 161.1 | 5(S)-HETE-d <sub>8</sub> | 327.2 → 116.0 |
| ±11-HDHA      | 14.40 | 343.2 → 165.2 | 5(S)-HETE-d <sub>8</sub> | 327.2 → 116.0 |
| ±7-HDHA       | 14.43 | 343.2 → 141.2 | 5(S)-HETE-d <sub>8</sub> | 327.2 → 116.0 |
| ±8-HDHA       | 14.50 | 343.2 → 109.1 | 5(S)-HETE-d <sub>8</sub> | 327.2 → 116.0 |
| ±4-HDHA       | 14.69 | 343.2 → 101.2 | 5(S)-HETE-d <sub>8</sub> | 327.2 → 116.0 |
| 15(S)-HETE    | 14.15 | 319.2 → 219.2 | 5(S)-HETE-d <sub>8</sub> | 327.2 → 116.0 |
| 11(S)-HETE    | 14.27 | 319.2 → 167.1 | 5(S)-HETE-d <sub>8</sub> | 327.2 → 116.0 |
| 12(S)-HETE    | 14.36 | 319.2 → 179.2 | 5(S)-HETE-d <sub>8</sub> | 327.2 → 116.0 |
| 8(S)-HETE     | 14.37 | 319.2 → 155.1 | 5(S)-HETE-d <sub>8</sub> | 327.2 → 116.0 |
| 9(R)-HETE     | 14.47 | 319.2 → 139.1 | 5(S)-HETE-d <sub>8</sub> | 327.2 → 116.0 |
| 5(S)-HETE     | 14.55 | 319.2 → 115.1 | 5(S)-HETE-d <sub>8</sub> | 327.2 → 116.0 |
| 15-OxoETE     | 14.13 | 317.1 → 113.1 | 5(S)-HETE-d <sub>8</sub> | 327.2 → 116.0 |
| 12-OxoETE     | 14.33 | 317.1 → 153.1 | 5(S)-HETE-d <sub>8</sub> | 327.2 → 116.0 |
| 5-OxoETE      | 14.72 | 317.1 → 203.1 | 5(S)-HETE-d <sub>8</sub> | 327.2 → 116.0 |
| 12(S)-HETRrE  | 14.63 | 321.1 → 180.8 | 5(S)-HETE-d <sub>8</sub> | 327.2 → 116.0 |
| ±12(13)-EpOME | 14.59 | 295.1 → 195.1 | 5(S)-HETE-d <sub>8</sub> | 327.2 → 116.0 |
| ±9(10)-EpOME  | 14.65 | 295.1 → 171.1 | 5(S)-HETE-d <sub>8</sub> | 327.2 → 116.0 |
| ±19(20)-EpDPA | 14.59 | 343.1 → 241.1 | 5(S)-HETE-d <sub>8</sub> | 327.2 → 116.0 |
| ±16(17)-EpDPA | 14.72 | 343.1 → 233.1 | 5(S)-HETE-d <sub>8</sub> | 327.2 → 116.0 |
| ±13(14)-EpDPA | 14.75 | 343.1 → 193.1 | 5(S)-HETE-d <sub>8</sub> | 327.2 → 116.0 |
| ±10(11)-EpDPA | 14.77 | 343.1 → 153.1 | 5(S)-HETE-d <sub>8</sub> | 327.2 → 116.0 |
| ±7(8)-EpDPA   | 14.85 | 343.1 → 112.8 | 5(S)-HETE-d <sub>8</sub> | 327.2 → 116.0 |

**Resolvins**

|                       |                                           |       |               |                                            |               |
|-----------------------|-------------------------------------------|-------|---------------|--------------------------------------------|---------------|
|                       | RvE <sub>1</sub>                          | 6.34  | 349.2 → 195.0 | RvD <sub>2</sub> -d <sub>5</sub>           | 380.4 → 175.0 |
|                       | RvD <sub>3</sub>                          | 8.80  | 375.2 → 147.1 | RvD <sub>2</sub> -d <sub>5</sub>           | 380.4 → 175.0 |
|                       | RvD <sub>2</sub>                          | 8.82  | 375.3 → 141.0 | RvD <sub>2</sub> -d <sub>5</sub>           | 380.4 → 175.0 |
|                       | RvD <sub>1</sub>                          | 9.21  | 375.2 → 141.0 | 17(R)-RVD1-d <sub>5</sub>                  | 380.3 → 220.3 |
|                       | RVD2 <sub>n-3</sub> DPA                   | 9.21  | 377.1 → 143.0 | 17(R)-RVD1-d <sub>5</sub>                  | 380.3 → 220.3 |
|                       | 17(R)-RVD <sub>1</sub>                    | 9.35  | 375.2 → 141.0 | 17(R)-RVD1-d <sub>5</sub>                  | 380.3 → 220.3 |
|                       | 17(R)-RVD <sub>4</sub> , RVD <sub>4</sub> | 9.92  | 375.2 → 101.0 | 17(R)-RVD1-d <sub>5</sub>                  | 380.3 → 220.3 |
|                       | RvD <sub>5</sub>                          | 11.30 | 359.2 → 199.0 | 17(R)-RVD1-d <sub>5</sub>                  | 380.3 → 220.3 |
|                       | RVD5 <sub>n-3</sub> DPA                   | 11.75 | 361.2 → 143.0 | 17(R)-RVD1-d <sub>5</sub>                  | 380.3 → 220.3 |
| <b>Lipoxins</b>       |                                           |       |               |                                            |               |
|                       | Lipoxin B <sub>4</sub>                    | 8.68  | 351.2 → 221.1 | Lipoxin A4-d <sub>5</sub>                  | 356.2 → 114.9 |
|                       | Lipoxin A <sub>4</sub>                    | 9.16  | 351.2 → 114.9 | Lipoxin A4-d <sub>5</sub>                  | 356.2 → 114.9 |
|                       | 15(R)-Lipoxin A <sub>4</sub>              | 9.30  | 351.2 → 114.9 | Lipoxin A4-d <sub>5</sub>                  | 356.2 → 114.9 |
|                       | 6(S)-Lipoxin A <sub>4</sub>               | 9.56  | 351.2 → 114.9 | Lipoxin A4-d <sub>5</sub>                  | 356.2 → 114.9 |
| <b>Maresin</b>        |                                           |       |               |                                            |               |
|                       | Maresin 1                                 | 11.49 | 359.3 → 112.9 | Leukotriene B <sub>4</sub> -d <sub>4</sub> | 339.3 → 197.1 |
|                       | Maresin 2                                 | 12.40 | 359.0 → 173.2 | Leukotriene B <sub>4</sub> -d <sub>4</sub> | 339.3 → 197.1 |
| <b>Leukotrienes</b>   |                                           |       |               |                                            |               |
|                       | Leukotriene B <sub>4</sub>                | 11.68 | 335.3 → 195.1 | Leukotriene B <sub>4</sub> -d <sub>4</sub> | 339.3 → 197.1 |
| <b>Protectin</b>      |                                           |       |               |                                            |               |
|                       | 17(R)-PD <sub>1</sub>                     | 10.57 | 359.0 → 152.9 | Leukotriene B <sub>4</sub> -d <sub>4</sub> | 339.3 → 197.1 |
|                       | PDX                                       | 11.26 | 359.3 → 153.0 | Leukotriene B <sub>4</sub> -d <sub>4</sub> | 339.3 → 197.1 |
|                       | PD <sub>1</sub>                           | 11.39 | 359.3 → 153.0 | Leukotriene B <sub>4</sub> -d <sub>4</sub> | 339.3 → 197.1 |
| <b>Prostaglandins</b> |                                           |       |               |                                            |               |
|                       | PGE <sub>3</sub>                          | 7.57  | 349.2 → 269.2 | PGE <sub>2</sub> -d <sub>9</sub>           | 360.2 → 189.0 |
|                       | PGF <sub>3</sub>                          | 7.76  | 351.1 → 193.2 | PGE <sub>2</sub> -d <sub>9</sub>           | 360.2 → 189.0 |
|                       | TX-B <sub>2</sub>                         | 8.03  | 369.3 → 195.0 | TX-B <sub>2</sub> -d <sub>4</sub>          | 373.3 → 199.1 |
|                       | 17-trans-PGF <sub>3</sub>                 | 8.09  | 351.1 → 193.2 | PGE <sub>2</sub> -d <sub>9</sub>           | 360.2 → 189.0 |
|                       | PGE <sub>2</sub>                          | 8.61  | 351.2 → 271.1 | PGE <sub>2</sub> -d <sub>9</sub>           | 360.2 → 189.0 |
|                       | PGD <sub>2</sub>                          | 8.77  | 351.2 → 271.1 | PGD <sub>2</sub> -d <sub>4</sub>           | 355.1 → 193.0 |
|                       | PGF <sub>2α</sub>                         | 8.80  | 353.3 → 193.2 | PGF <sub>2α</sub> -d <sub>4</sub>          | 357.3 → 197.2 |

**Supplementary table 2. Lower quantification limit (LOQ) in pg/mg for each tissue.**

| Compound                               | LOQ in soleus (pg/mg) | LOQ in tibialis (pg/mg) |
|----------------------------------------|-----------------------|-------------------------|
| <b>Derived from AA</b>                 |                       |                         |
| 15-E <sub>2t</sub> -IsoP               | 2.28                  | 1.14                    |
| 5( <i>RS</i> )-5-F <sub>2c</sub> -IsoP | 1.67                  | 0.83                    |
| PGF <sub>2α</sub>                      | 1.54                  | 0.77                    |
| PGD <sub>2</sub>                       | 2.41                  | 1.21                    |
| PGE <sub>2</sub>                       | 1.67                  | 0.83                    |
| TX-B <sub>2</sub>                      | 0.33                  | 0.17                    |
| 5( <i>S</i> )-HETE                     | 0.33                  | 0.17                    |
| 5-OxoETE                               | 3.33                  | 1.67                    |
| 8( <i>S</i> )-HETE                     | 1.67                  | 0.83                    |
| 9( <i>R</i> )-HETE                     | 1.86                  | 0.93                    |
| 12( <i>S</i> )-HETE                    | 0.33                  | 0.17                    |
| 12-OxoETE                              | 3.94                  | 1.97                    |
| 15( <i>S</i> )-HETE                    | 1.81                  | 0.90                    |
| 15-OxoETE                              | 0.92                  | 0.46                    |
| <b>Derived from LA, GLA, ALA</b>       |                       |                         |
| 12( <i>S</i> )-HETRe                   | 0.58                  | 0.29                    |
| 9( <i>S</i> )-HOTRe                    | 0.33                  | 0.17                    |
| 13( <i>S</i> )-HOTRe                   | 1.67                  | 0.83                    |
| ±12(13)-EpOME                          | 0.40                  | 0.20                    |
| ±12(13)-DiHOME                         | 0.33                  | 0.17                    |
| ±9(10)-EpOME                           | 1.67                  | 0.83                    |
| ±9(10)-DiHOME                          | 0.33                  | 0.17                    |
| 9( <i>S</i> )-HODE                     | 1.67                  | 0.83                    |
| 9-OxoODE                               | 1.67                  | 0.83                    |
| 13( <i>S</i> )-HODE                    | 8.32                  | 4.16                    |
| 13-OxoODE                              | 8.08                  | 4.04                    |
| <b>Derived from EPA</b>                |                       |                         |
| PGF <sub>3</sub>                       | 7.24                  | 3.62                    |
| 5( <i>S</i> )-HEPE                     | 1.67                  | 0.83                    |
| ±8-HEPE                                | 1.67                  | 0.83                    |
| 15( <i>S</i> )-HEPE                    | 3.32                  | 1.66                    |
| ±17(18)-DiHETE                         | 1.67                  | 0.83                    |
| <b>Derived from DHA</b>                |                       |                         |
| ±4-HDHA                                | 1.67                  | 0.83                    |
| ±7-HDHA                                | 1.67                  | 0.83                    |
| ±8-HDHA                                | 1.67                  | 0.83                    |
| ±11-HDHA                               | 1.67                  | 0.83                    |

|              |      |      |
|--------------|------|------|
| ±13-HDHA     | 1.67 | 0.83 |
| ±14-HDHA     | 3.33 | 1.67 |
| ±16-HDHA     | 1.67 | 0.83 |
| ±17-HDHA     | 1.67 | 0.83 |
| ±20-HDHA     | 1.67 | 0.83 |
| ±7(8)EpDPA   | 5.12 | 2.56 |
| ±10(11)EpDPA | 0.78 | 0.39 |
| ±13(14)EpDPA | 1.67 | 0.83 |
| ±16(17)EpDPA | 1.67 | 0.83 |
| ±19(20)EpDPA | 6.56 | 3.28 |

---
